# Supplementary material for: Protonation of rhodanine polymers for enhancing the capture and recovery of Ag+ from highly acidic wastewater
Source: Royal Society of Chemistry journal article supplement (doi:10.1039/c9en00833k), 2019-01-01
Supplement: c9en00833k1.pdf [file c9en00833k1.pdf]

## Supplementary data

### Protonation of Rhodanine Polymers for Enhancing Capture and Recovery of $\text{Ag}^+$ from Highly Acidic Wastewater

Xiaocui Yin<sup>a,b</sup>, Penghui Shao<sup>a</sup>, Lin Ding<sup>a</sup>, Yu Xi<sup>a</sup>, Kai Zhang<sup>a</sup>, Liming Yang<sup>a</sup>, Hui Shi<sup>a</sup>, and Xubiao  
Luo<sup>\*,a,b</sup>

<sup>a</sup> Key Laboratory of Jiangxi Province for Persistent Pollutant Control and Resource Recycling  
Nanchang Hangkong University, Nanchang, 330063, P. R. China

E-mail: luoxubiao@126.com

<sup>b</sup> College of Chemistry, Nanchang University, Nanchang, 330063, P. R. China

Text Sections: S1 – S3

Figures: S1 – S9

Table: S1-S2

## S1 Adsorption isotherms

Adsorption equilibrium experiments were carried out to examine the adsorption capacity of PAR for Ag<sup>+</sup> ions with the initial concentration range of 10-1200 mg L<sup>-1</sup> at pH -0.2. According to **Fig. S4**, the adsorption capacities for Ag<sup>+</sup> ions increased with increasing Ag<sup>+</sup> concentration, and the maximum adsorption amount or monolayer coverage was achieved at the initial concentration of 800 mg L<sup>-1</sup>. The Langmuir and Freundlich models were used to fit the adsorption data. The linearized Langmuir and Freundlich isotherms can be described as following equations:

$$\text{Langmuir model: } \frac{C_e}{Q_e} = \frac{C_e}{Q_m} + \frac{1}{k_l \bullet Q_m} \quad (\text{s1})$$

$$\text{Freundlich model: } \lg Q_e = \frac{1}{n} \lg C_e + \lg k_f \quad (\text{s2})$$

Where  $C_e$  (mg L<sup>-1</sup>) and  $Q_e$  (mg g<sup>-1</sup>) are, respectively, the concentration and adsorbed amount of Ag<sup>+</sup> at adsorption equilibrium.  $K_l$  and  $K_f$  represent the Langmuir constant (L g<sup>-1</sup>) and the Freundlich constant (mg<sup>1-(1/n)</sup> L<sup>1/n</sup> g<sup>-1</sup>), respectively;  $Q_m$  is the maximum adsorption capacity (mg g<sup>-1</sup>) of the adsorbent. The corresponding fitting results were listed in **Table S2**.

The sorption isotherms fit Langmuir model better than Freundlich model due to the larger correlation coefficient ( $R^2$ ), suggesting that Ag<sup>+</sup> sorption on PAR is monolayer sorption process.

## S2 Adsorption kinetics

The adsorption kinetics of Ag<sup>+</sup> adsorption on polymer were investigated, and the results were described in **Fig. S6**. In addition, the polymer demonstrated good performances in the first 50 min and then reach the equilibrium after 100 min.

To discern the rate-controlling step in the adsorption process of Ag<sup>+</sup> ions, rate constants of adsorptions were analyzed by the pseudo-first-order and pseudo-second-order kinetic models, respectively, which can be expressed as:

$$\ln(q_e - q_t) = \ln q_e - k_1 t \quad (3)$$

$$\frac{t}{q_t} = \frac{1}{k_2 q_e^2} + \frac{t}{q_e} \quad (4)$$

where  $t$  represents the contact time (min);  $q_t$  and  $q_e$  denotes the amount of Ag<sup>+</sup> adsorbed at a given time  $t$  and at equilibrium (mg g<sup>-1</sup>), respectively.  $k_1$  (min<sup>-1</sup>) and  $k_2$  (g mg<sup>-1</sup> min<sup>-1</sup>) are the rate constants of adsorption, respectively.

Plots of the experimental data and the model fitting were illustrated in **Fig.S6**. The correlation kinetic parameters from both models were listed in **Table S1**. From the correlation coefficients ( $R^2$ ) data, we think that the adsorption process of  $\text{Ag}^+$  ions are more suitable for the pseudo-second-order kinetic model. In addition, the theoretical  $q_e$  values calculated by the pseudo-second order model were  $239.2 \text{ mg g}^{-1}$ , which is closer to experiments value  $235.0 \text{ mg g}^{-1}$ . Apparently, the adsorption behavior for  $\text{Ag}^+$  ion is more consistent with the pseudo-second-order kinetics model, suggesting that the adsorption rate is controlled by the chemical adsorption.

### S3 Dubinin-Radushkevich (D-R) model

The linearized D-R model is expressed as the following equation:

$$\ln q_e = \ln q_m - K_{DR} \varepsilon^2 \quad (2)$$

where  $q_e$  and  $q_m$  are the disequilibrium and theoretical saturation capacity, respectively;  $K_{DR}$  denotes the constant which is related to the mean free energy of adsorption;  $\varepsilon$  is the Polanyi potential which can be calculated by using the following formula:

$$\varepsilon^2 = RT \ln\left(1 + \frac{1}{C_e}\right) \quad (3)$$

where parameters  $R$ ,  $T$  and  $C_e$  denote the ideal gas constant, the adsorption temperature in Kelvin (K) and the equilibrium concentration, respectively.  $q_m$  and  $K_{DR}$  could be calculated from the intercept and slope of the plot for  $\ln q_e$  against  $\varepsilon^2$ . Subsequently, the adsorption energy ( $E$ ) can be obtained by the following equation:

$$E = (2K_{DR})^{-1/2} \quad (\text{s4})$$

The relationship between adsorption energy and adsorption processes can be well demonstrated by the adsorption energy which was calculated from the above formula. when  $E$  is less than  $8 \text{ kJ mol}^{-1}$ , the physical adsorption dominates the reaction; when  $E$  is between  $8$  to  $16 \text{ kJ mol}^{-1}$ , the ion-exchange dominates the reaction; when  $E$  is between  $20$  to  $40 \text{ kJ mol}^{-1}$ , chemical adsorption dominates the reaction.

## Figures

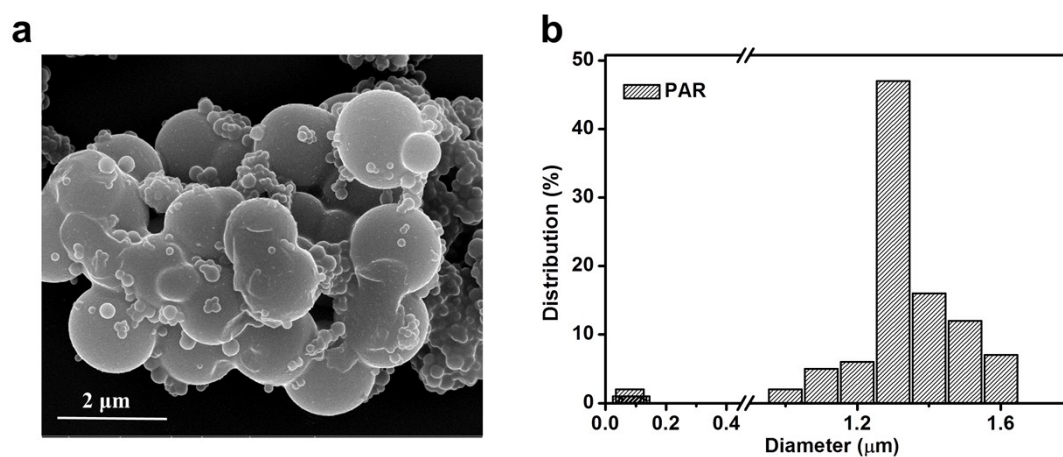

**Fig. S1** (a) SEM image of PAR and (b) particle size distribution mapping.

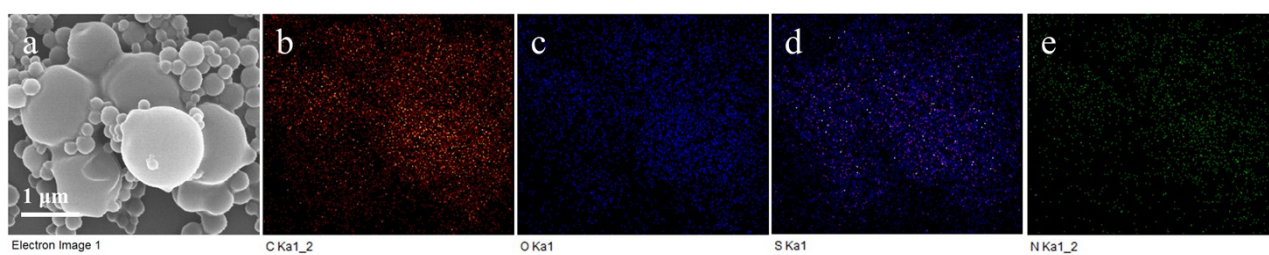

**Fig. S2** (a) SEM image and the corresponding EDS mappings for (b) C, (c) O, (d) S, (e) N elements of PAR before adsorption  $\text{Ag}^+$ .

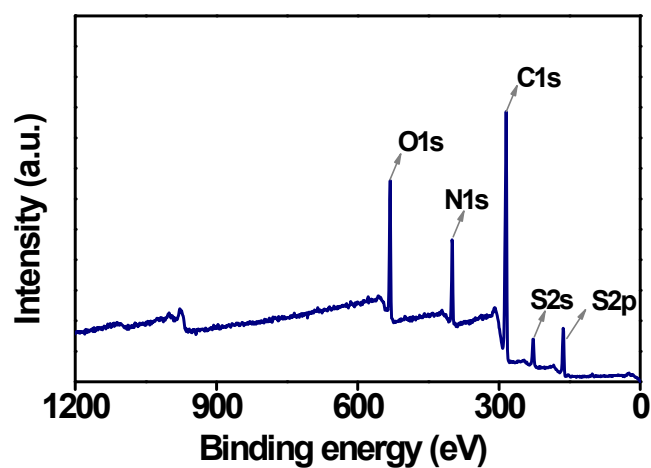

**Fig. S3** XPS full-scan spectrum of PAR

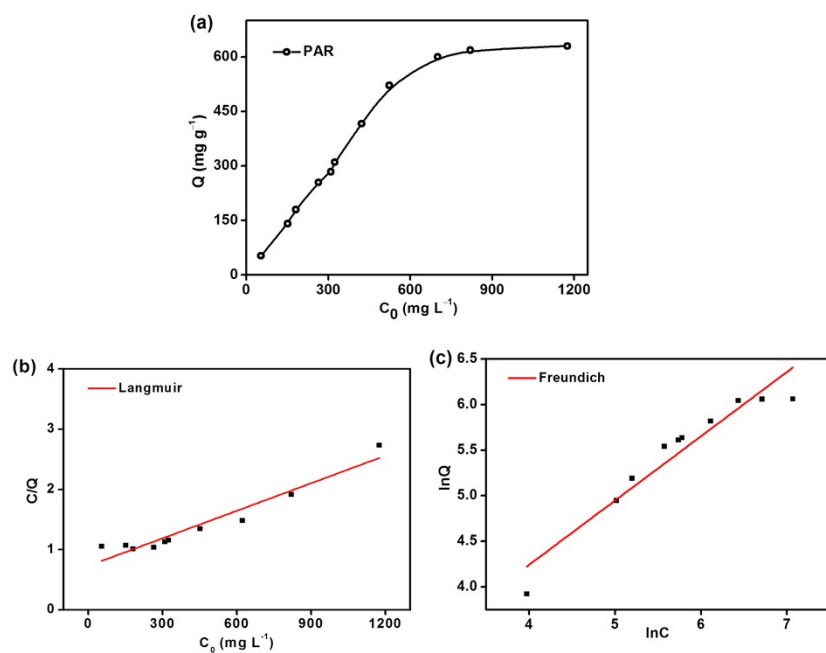

**Fig. S4** (a) Effects of  $\text{Ag}^+$  initial concentration on the adsorptivity of PAR; The corresponding fitting results by the (b) Langmuir model and (c) Freundlich model.

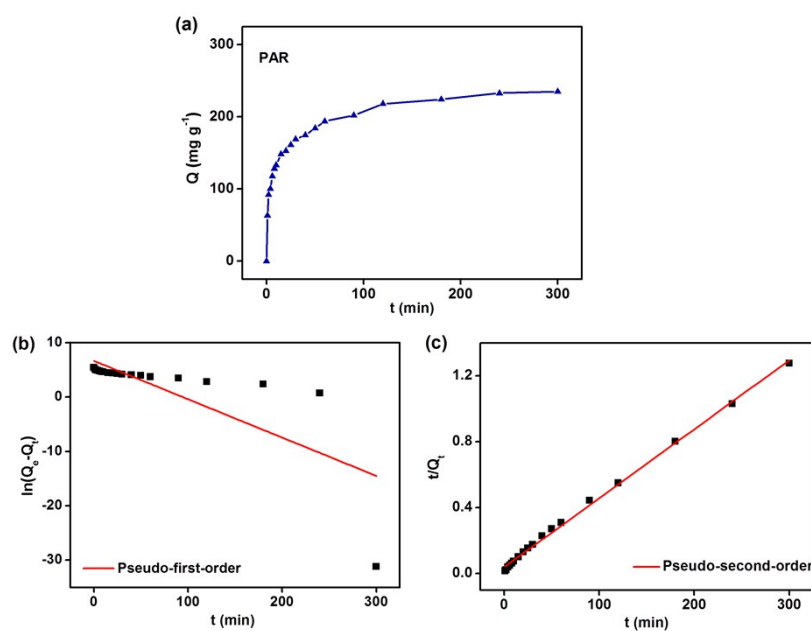

**Fig. S5** (a) Effect of equilibrium time on the adsorption of  $\text{Ag}^+$  by PAR. (b) Pseudo-first-order and (c) Pseudo-second-order kinetic for  $\text{Ag}^+$  adsorption by PAR.

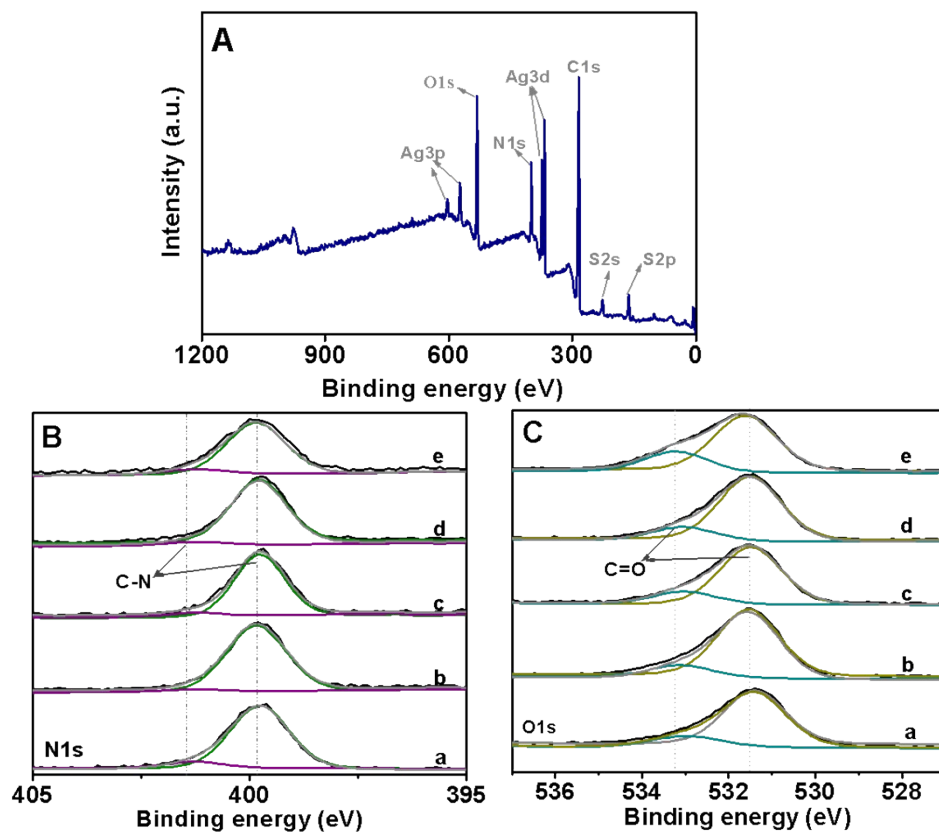

**Fig. S6** XPS full-scan spectrum of PAR after adsorption of silver (A); High-resolution XPS spectra of N1s (B) and O1s (C) for the PAR before (a) and after adsorption of silver under different pH (b-e: pH=2.0, 1.0, 0.0, -0.2)

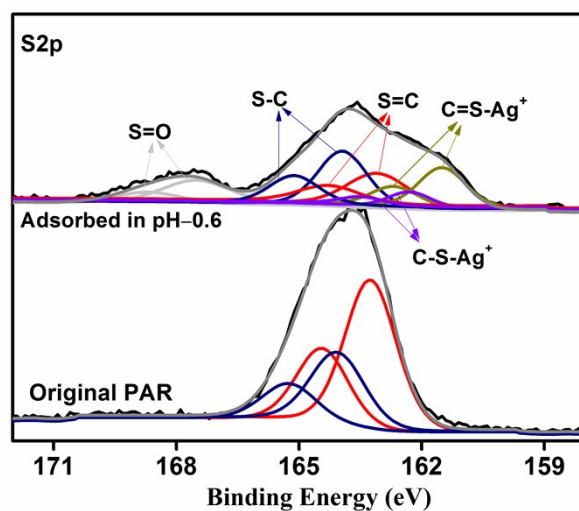

**Fig. S7** The high resolution XPS spectra of S2p of polyallylthiuronine and after adsorption at pH= -0.6

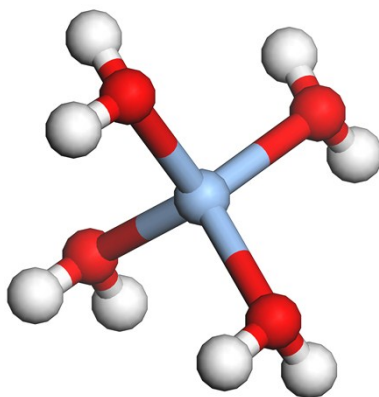

**Fig. S8** The structure of hydrated  $\text{Ag}^+$  ion. The colour of atom: white: H; red: O; cyan: Ag).

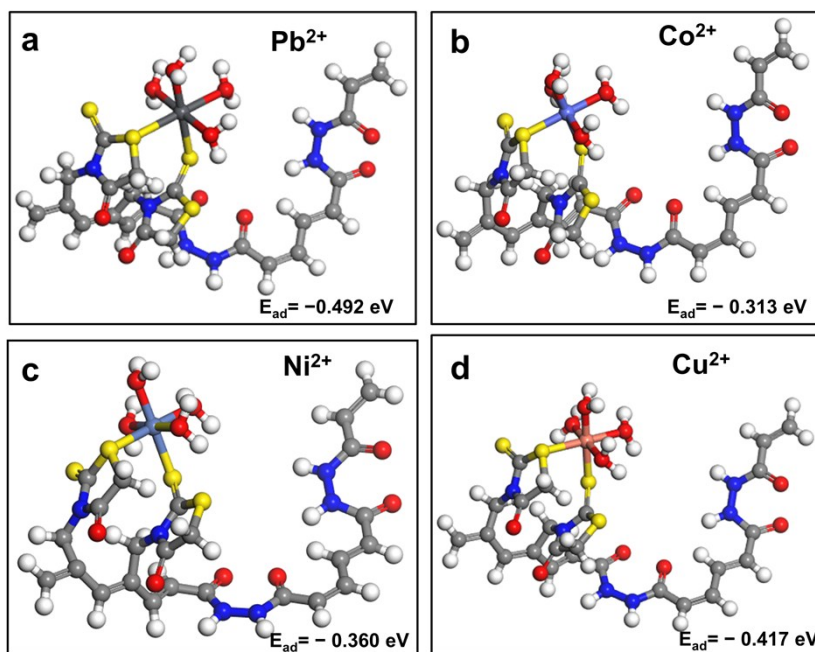

**Fig. S9** Adsorption energies ( $E_{\text{ad}}$ ) of PAR combined with various metal ions. (a)  $\text{Pb}^{2+}$ , (b)  $\text{Co}^{2+}$ , (c)  $\text{Ni}^{2+}$ , (d)  $\text{Cu}^{2+}$ .

## Tables

**Table S1.** Fitting results by the Langmuir and Freundlich models.

| Langmuir constants          |                             |        | Freundlich constants                                            |       |        |
|-----------------------------|-----------------------------|--------|-----------------------------------------------------------------|-------|--------|
| $Q_m$ (mg g <sup>-1</sup> ) | $k_l$ (L mg <sup>-1</sup> ) | $R^2$  | $k_f$ (mg <sup>1-(1/n)</sup> L <sup>1/n</sup> g <sup>-1</sup> ) | $n$   | $R^2$  |
| 653                         | 0.0021                      | 0.9227 | 26.27                                                           | 1.417 | 0.9094 |

**Table S2** Adsorption kinetic parameters of PAR.

|                     | $K$                                                       | $Q_{cal}$ (mg g <sup>-1</sup> ) | $R^2$  |
|---------------------|-----------------------------------------------------------|---------------------------------|--------|
| Pseudo-first order  | $7.051 \times 10^{-2} \text{ min}^{-1}$                   | 778                             | 0.5410 |
| Pseudo-second order | $4.368 \times 10^{-4} \text{ g mg}^{-1} \text{ min}^{-1}$ | 239                             | 0.9976 |
